# Supplementary material for: Enhanced Immunogenicity of Inactivated Dengue Vaccines by Novel Polysaccharide-Based Adjuvants in Mice
Source: MDPI journal article supplement (doi:10.3390/microorganisms10051034), 2022-05-16
Supplement: s1 [file s1]

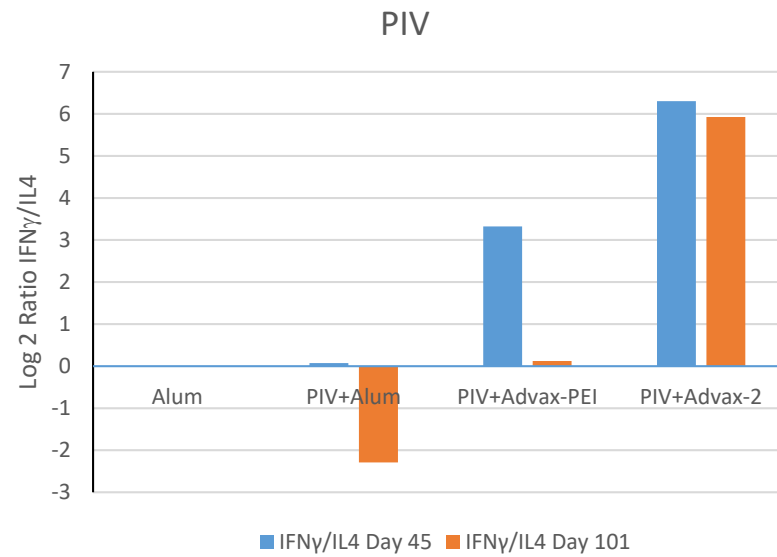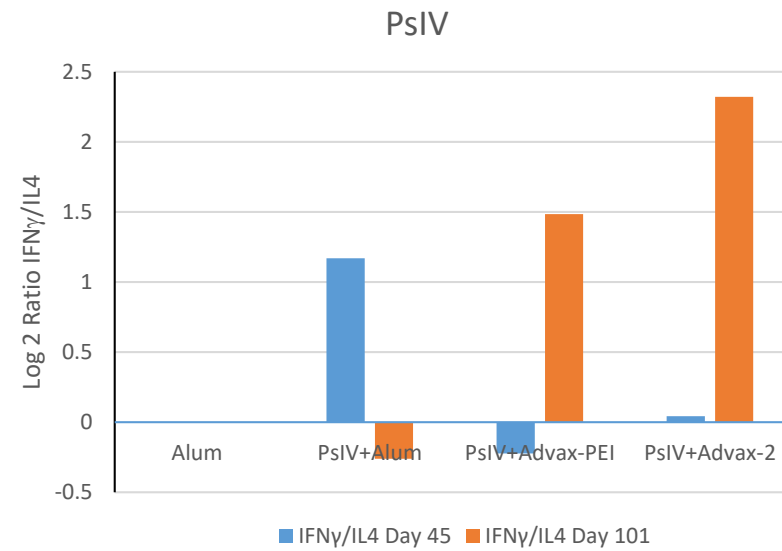

Figure S3. Log 2 ratio of IFN $\gamma$  and IL4 for data in Figure 6 is shown for responses to D2CPrME. Ratio for responses to Mock is not shown.
