# Supplementary material for: Enhanced Immunogenicity of Inactivated Dengue Vaccines by Novel Polysaccharide-Based Adjuvants in Mice
Source: MDPI journal article supplement (doi:10.3390/microorganisms10051034), 2022-05-16
Supplement: s1 [file s1]

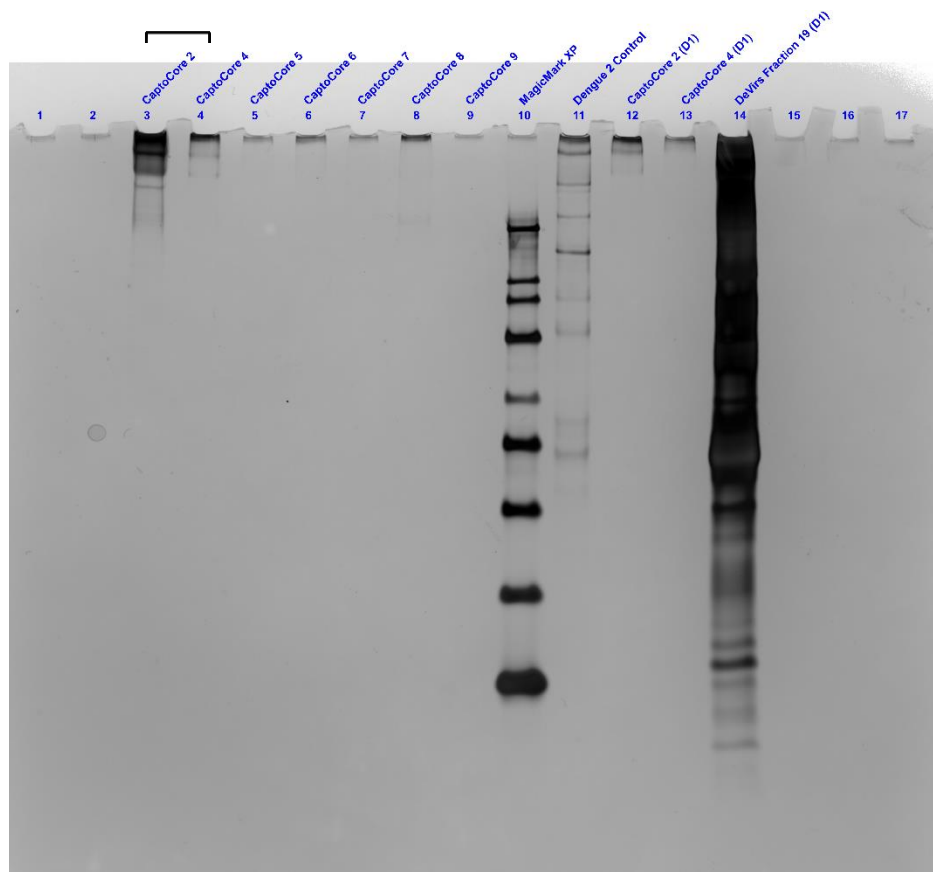

Figure S2. Silver Stain of Capto Core 700 column fractions run on Novex 4-12% Tris-Glycine native gel. Fractions 2 to 4 contain highly purified DENV-2 PsIV.
